# Supplementary material for: Nanoscopic distribution of VAChT and VGLUT3 in striatal cholinergic varicosities suggests colocalization and segregation of the two transporters in synaptic vesicles
Source: PubMed Central journal article supplement (PMC9513193; doi:10.3389/fnmol.2022.991732), 2022-09-13

**Supplementary Figure 1 : Related to Figure 2. Effect of deconvolution on VACHT- and VGLUT3-immunofluorescent spot resolution.** (A) Representative raw STED image of VACHT and VGLUT3-immunofluorescent spots. (B) The same raw image after post-processing using the Gaussian blur filter in ImageJ with a radius of 1 pixel ( $\sigma=1$ ). (C,D) Images after post-processing using Huygens Deconvolution with or without Gaussian blur filter. (E,F) Quantification of the mean diameter of VACHT- and VGLUT3- fluorescent spots with STED microscopy before and after deconvolution and Gauss blur filter. Quantification of 109 VACHT- and 100 VGLUT3- fluorescent spots. Wilcoxon matched-pairs signed rank test,  $**p<0.0001$ . Fluorochromes: Alexa 594 (VACHT), Abberior Star 635P (VGLUT3).

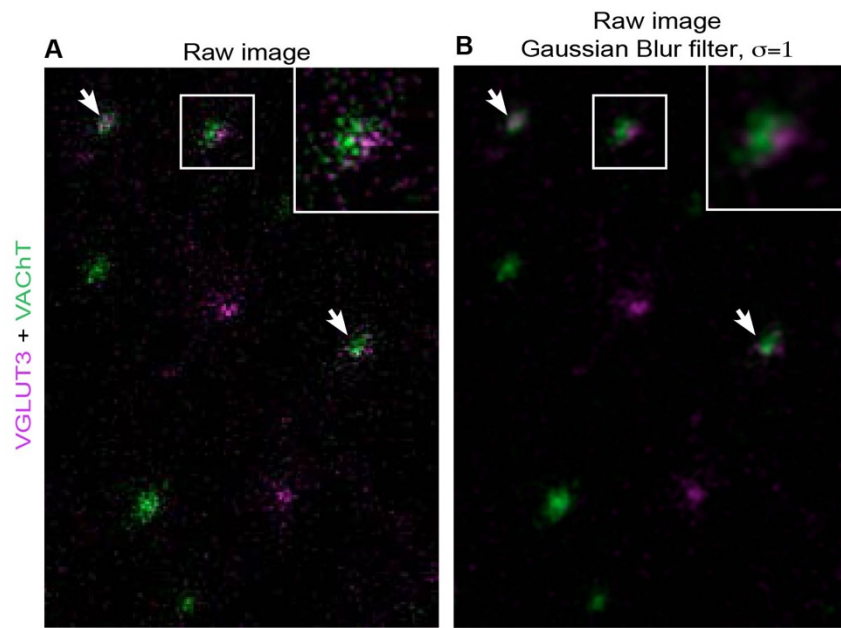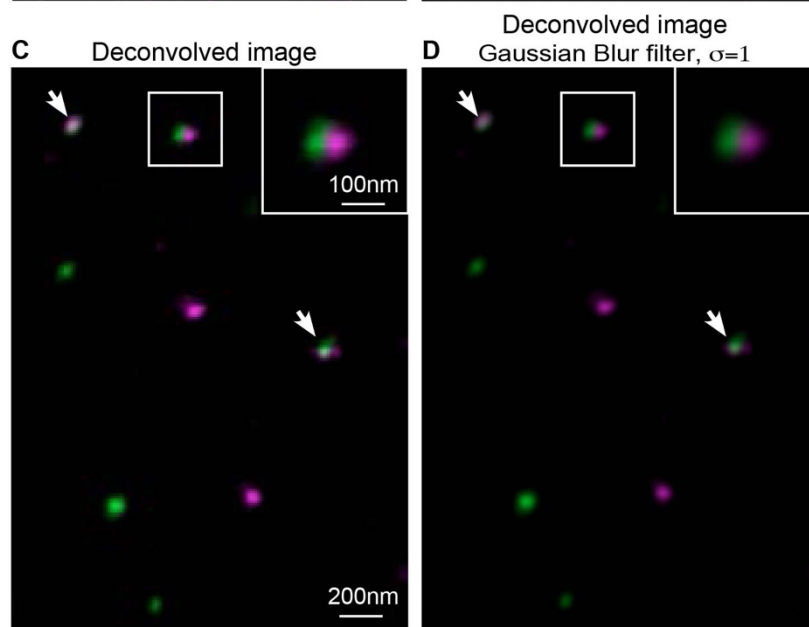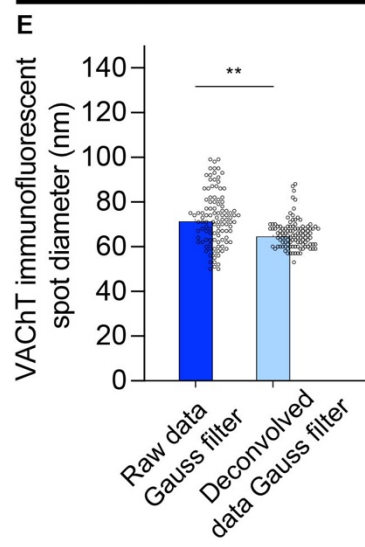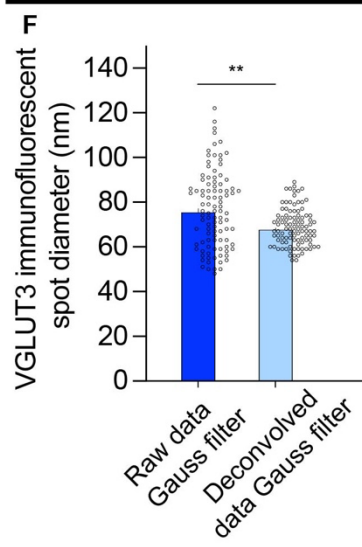

Supplement: Image_1.pdf [file Image_1.pdf]
