# Supplementary material for: Nanoscopic distribution of VAChT and VGLUT3 in striatal cholinergic varicosities suggests colocalization and segregation of the two transporters in synaptic vesicles
Source: PubMed Central journal article supplement (PMC9513193; doi:10.3389/fnmol.2022.991732), 2022-09-13

**Supplementary Figure 3 : Related to Figure 3. Models to evaluate the distribution of SVs in preparations of isolated striatal SVs and based-NND quantification. (A) Clusterization model.** Schematic representation of VACHT- and VGLUT3-immunopositive spots in a clustered distribution. The circle represents the area of analysis and is similar to the surface of a CINs varicosity (500 nm in diameter). **(B) Dispersion model.** Schematic representation of VACHT- and VGLUT3-immunopositive spots in a dispersed distribution. **(C) Quantification of the proportion of the first, second, third or fourth NNDs below or above 500 nm using the DiAna plugin.** Quantification from 1506 pairs of VACHT-VGLUT3 spots, from 3 experiments.

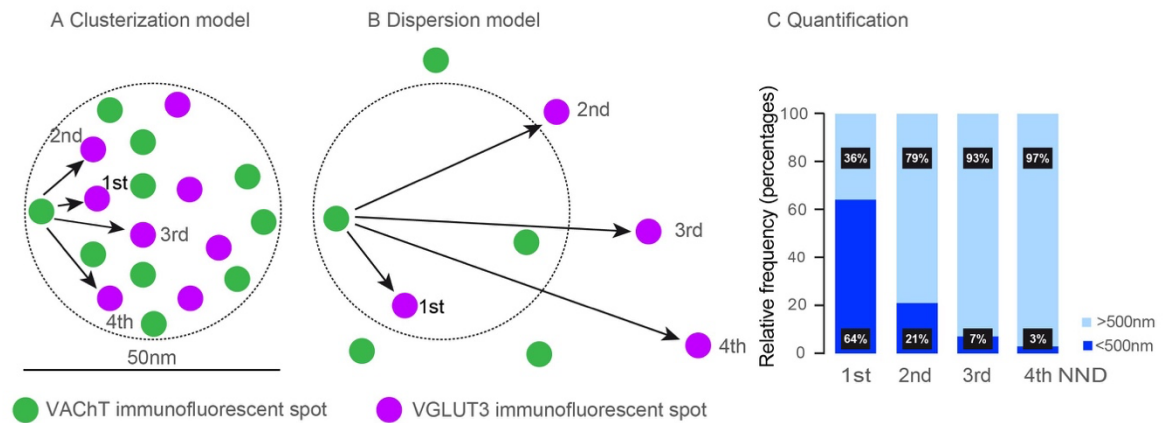

Supplement: Image_3.pdf [file Image_3.pdf]
