# Supplementary material for: Nanoscopic distribution of VAChT and VGLUT3 in striatal cholinergic varicosities suggests colocalization and segregation of the two transporters in synaptic vesicles
Source: PubMed Central journal article supplement (PMC9513193; doi:10.3389/fnmol.2022.991732), 2022-09-13
Supplement: Table_1.pdf [file Table_1.pdf]

**Supplementary Table 1 : Related to Figure 2. Quantification of the mean diameter of VGLUT3 and VACHT fluorescent spots with confocal or STED microscopy in the mouse dorsolateral striatum with confocal and STED microscopy.**

| <b>Mean diameter of fluorescent spots</b> |                         |
|-------------------------------------------|-------------------------|
| <b>Confocal vs STED</b>                   |                         |
| Wilcoxon matched-pairs signed rank test   |                         |
| <b>VGLUT3</b>                             | <b>VACHT</b>            |
| n=110 fluorescent spots                   | n=110 fluorescent spots |
| $p<0.0001$                                | $p<0.0001$              |
