# Supplementary material for: Nanoscopic distribution of VAChT and VGLUT3 in striatal cholinergic varicosities suggests colocalization and segregation of the two transporters in synaptic vesicles
Source: PubMed Central journal article supplement (PMC9513193; doi:10.3389/fnmol.2022.991732), 2022-09-13
Supplement: Table_2.pdf [file Table_2.pdf]

**Supplementary Table 2 : Related to Supplementary Figure 2. Quantification of the mean diameter of fluorescent spots with STED microscopy before and after deconvolution and Gauss blur filter.**

| <b>Mean diameter of fluorescent spots – STED</b> |                         |
|--------------------------------------------------|-------------------------|
| <b>Before and after deconvolution</b>            |                         |
| Wilcoxon matched-pairs signed rank test          |                         |
| <b>VACHT</b>                                     | <b>VGLUT3</b>           |
| n=109 fluorescent spots                          | n=100 fluorescent spots |
| $p < 0.0001$                                     | $p < 0.0001$            |
