# Supplementary material for: Nanoscopic distribution of VAChT and VGLUT3 in striatal cholinergic varicosities suggests colocalization and segregation of the two transporters in synaptic vesicles
Source: PubMed Central journal article supplement (PMC9513193; doi:10.3389/fnmol.2022.991732), 2022-09-13
Supplement: Table_3.pdf [file Table_3.pdf]

**Supplementary Table 3 : Related to Figure 2. Quantification of the mean number of VGLUT3, VACHT and VACHT + VGLUT3 fluorescent spots per surface of microscope slide with STED microscopy in isolated striatal synaptic vesicles from VGLUT3<sup>+/+</sup> and VGLUT3<sup>-/-</sup> mice.**

| Kruskal Wallis test, Dunn's post hoc test     |                       |                       |                         |                       |                         |
|-----------------------------------------------|-----------------------|-----------------------|-------------------------|-----------------------|-------------------------|
| <b>VACHT fluorescent spots</b>                |                       |                       |                         |                       |                         |
| n=19 microscopic fields (625µm <sup>2</sup> ) |                       |                       |                         |                       |                         |
| VGLUT3 <sup>+/+</sup>                         | VGLUT3 <sup>-/-</sup> | VGLUT3 <sup>+/+</sup> | No anti-VGLUT3 antibody | VGLUT3 <sup>-/-</sup> | No anti-VGLUT3 antibody |
| nb spots = 6348                               | nb spots = 3927       | nb spots = 6348       | nb spots = 5233         | nb spots = 3927       | nb spots = 5233         |
| <i>P</i> <0.0001                              |                       | <i>P</i> <0.0001      |                         | <i>p</i> =0,6378      |                         |
| <b>VGLUT3 fluorescent spots</b>               |                       |                       |                         |                       |                         |
| n=19 microscopic fields (625µm <sup>2</sup> ) |                       |                       |                         |                       |                         |
| VGLUT3 <sup>+/+</sup>                         | VGLUT3 <sup>-/-</sup> | nb spots =4301        | No anti-VGLUT3 antibody | VGLUT3 <sup>-/-</sup> | No anti-VGLUT3 antibody |
| nb spots =4301                                | nb spots = 293        | nb spots =4301        | nb spots = 381          | nb spots = 293        | nb spots = 381          |
| <i>p</i> <0.0001                              |                       | <i>p</i> <0.0001      |                         | <i>p</i> >0.9999      |                         |
| <b>VACHT + VGLUT3 fluorescent spots</b>       |                       |                       |                         |                       |                         |
| n=19 microscopic fields (625µm <sup>2</sup> ) |                       |                       |                         |                       |                         |
| VGLUT3 <sup>+/+</sup>                         | VGLUT3 <sup>-/-</sup> | VGLUT3 <sup>+/+</sup> | No anti-VGLUT3 antibody | VGLUT3 <sup>-/-</sup> | No anti-VGLUT3 antibody |
| nb spots = 696                                | nb spots = 40         | nb spots = 696        | nb spots = 28           | nb spots = 40         | nb spots = 28           |
| <i>p</i> <0.0001                              |                       | <i>p</i> <0.0001      |                         | <i>p</i> >0.9999      |                         |
