# Supplementary material for: Nanoscopic distribution of VAChT and VGLUT3 in striatal cholinergic varicosities suggests colocalization and segregation of the two transporters in synaptic vesicles
Source: PubMed Central journal article supplement (PMC9513193; doi:10.3389/fnmol.2022.991732), 2022-09-13
Supplement: Table_4.pdf [file Table_4.pdf]

**Supplementary Table 4 : Related to Figure 3. Frequency distributions of the NND between VAcHt and VGLUT3, VGLUT1 and VGLUT3, VGLUT1 and VGLUT3-immunofluorescent spots. Observation under a STED microscope of isolated striatal synaptic vesicles.**

| <b>Frequency distributions of the NND</b>                             |                                                                       |                                                                                       |
|-----------------------------------------------------------------------|-----------------------------------------------------------------------|---------------------------------------------------------------------------------------|
| Kolmogorov-Smirnov test                                               |                                                                       |                                                                                       |
| n=7048 (VAcHt and VGLUT3) and 6017 (VGLUT1 and VGLUT3) pairs of spots | n=7048 (VAcHt and VGLUT3) and 6827 (VGLUT2 and VGLUT3) pairs of spots | n=6017 (VGLUT1 and VGLUT3) pairs of spots and 6827 (VGLUT2 and VGLUT3) pairs of spots |
| <b>VAcHt and VGLUT3 vs. VGLUT1 and VGLUT3</b>                         | <b>VAcHt and VGLUT3 vs. VGLUT2 and VGLUT3</b>                         | <b>VGLUT1 and VGLUT3 vs. VGLUT2 and VGLUT3</b>                                        |
| <i>p</i> <0.0001                                                      | <i>p</i> <0.0001                                                      | <i>p</i> <0.0001                                                                      |
